# Supplementary material
Source: PubMed Central journal article supplement (PMC4207208)
Supplement: NIHMS634315-supplement-supplement_1.pdf [file NIHMS634315-supplement-supplement_1.pdf]

SUPPLEMENTAL MATERIAL (APPENDIX)

**Appendix Table 4: Association between a combined exposure of baseline PAD or incident symptomatic PAD event and subsequent cardiovascular events in patients with coronary artery disease**

| <i>Cardiovascular outcome event</i> | <i>Base model*</i>  |               |                | <i>Full model**</i> |               |                |
|-------------------------------------|---------------------|---------------|----------------|---------------------|---------------|----------------|
|                                     | <i>Hazard Ratio</i> | <i>95% CI</i> | <i>p-value</i> | <i>Hazard Ratio</i> | <i>95% CI</i> | <i>p-value</i> |
| Composite endpoint                  | 1.6                 | 1.2, 2.1      | 0.0003         | 1.4                 | 1.0, 1.8      | 0.02           |
| Death                               | 2.2                 | 1.7, 2.9      | <0.0001        | 1.8                 | 1.3, 2.3      | 0.0001         |
| MI                                  | 1.3                 | 0.7, 2.2      | 0.42           | 1.0                 | 0.6, 1.8      | 0.99           |
| CHF                                 | 1.9                 | 1.3, 2.9      | 0.002          | 1.6                 | 1.0, 2.4      | 0.05           |
| Stroke/TIA                          | 1.4                 | 0.7, 3.0      | 0.35           | 1.3                 | 0.6, 2.8      | 0.47           |
| Revascularization                   | 1.4                 | 0.8, 2.2      | 0.22           | 1.2                 | 0.7, 2.0      | 0.48           |

**TABLE LEGEND:** CI, confidence interval.

This is taken from the following number of events (Composite endpoint=525; death=382; MI=126; CHF=174; stroke/TIA=65; coronary revascularization=154).

\* Adjusted for age, sex, and race

\*\*Included age, sex, race, and all variables that changed the effect size for incident PAD by >5%: traditional risk factors for PAD (smoking, statins, diuretics), cardiac disease severity (LVEF), inflammatory markers (IL-6, TNF-alpha, fibrinogen), behavioral factors (alcohol use) and glycemic control/insulin resistance (Hemoglobin A1c).
